# Supplementary material for: Bloodstream infections due to carbapenemase-producing Enterobacteriaceae in Italy: results from nationwide surveillance, 2014 to 2017
Source: PubMed Central journal article supplement (PMC6386214; doi:10.2807/1560-7917.es.2019.24.5.1800159), 2019-01-31
Supplement: 1800159_IACCHINI_Supplement.pdf [file 1800159_IACCHINI_Supplement.pdf]

This supplementary material is hosted by *Eurosurveillance* as supporting information alongside the article ‘Bloodstream infections due to carbapenemase-producing Enterobacteriaceae in Italy: results from nationwide surveillance, 2014 to 2017’ on behalf of the authors who remain responsible for the accuracy and appropriateness of the content. The same standards for ethics, copyright, attributions and permissions as for the article apply. *Eurosurveillance* is not responsible for the maintenance of any links or email addresses provided therein.

Supplement. Number of carbapenem-resistant *K. pneumoniae* (panel A) and *E. coli* (panel B) isolates, Italy, 2014-2016. Comparison between data from the national surveillance system for carbapenemase-producing Enterobacteriaceae (CPE) and data from other sources.

A

| region         | carbapenem-resistant <i>K. pneumoniae</i> isolates |                   |                       |                   |                       |                   | type of other data source    |
|----------------|----------------------------------------------------|-------------------|-----------------------|-------------------|-----------------------|-------------------|------------------------------|
|                | 2014                                               |                   | 2015                  |                   | 2016                  |                   |                              |
|                | national surveillance                              | other data source | national surveillance | other data source | national surveillance | other data source |                              |
| Piemonte       | 248                                                | 234               | 239                   | 244               | 220                   | 283               | regional surv. <sup>c</sup>  |
| Emilia-Romagna | 147                                                | 129               | 222                   | 260               | 265                   | 255               | regional report <sup>d</sup> |
| Campania       | 61                                                 | 162 <sup>a</sup>  | 61                    | 198 <sup>a</sup>  | 106                   | 305 <sup>a</sup>  | regional report <sup>e</sup> |
| Toscana        | 111                                                | 266 <sup>b</sup>  | 90                    | 261 <sup>b</sup>  | 112                   | 298 <sup>b</sup>  | regional report <sup>f</sup> |

<sup>a</sup> the regional antimicrobial resistance report shows this number of *K. pneumoniae* or *E. coli* isolates from blood and liquor as resistant to meropenem and/or imipenem; here we report the highest number of cases resistant to either antibiotic.

<sup>b</sup> the regional antimicrobial resistance report shows this number of *K. pneumoniae* or *E. coli* isolates from blood as resistant to meropenem and/or imipenem; here we report the highest number of cases resistant to either antibiotic.

<sup>c</sup> <https://www.seremi.it/viz-condizioni/Antibioticoresistenze>

<sup>d</sup> <http://assr.regione.emilia-romagna.it/it/servizi/pubblicazioni/rapporti-documenti/sorveglianza-antibioticoresistenza-uso-antibiotici-rapporto-2016>

<sup>e</sup> <http://www.regione.campania.it/regione/it/tematiche/antibiotico-resistenza-ed-infezioni-correlate-all-assistenza-64in/antibiotico-resistenza-ed-infezioni-correlate-all-assistenza-r11p>

<sup>f</sup> <https://www.ars.toscana.it/it/pubblicazioni/rapporti-relazioni-e-sintesi/2017/3855-report-2016-su-antibiotico-resistenza-e-uso-di-antibiotici-in-toscana.html>

B

| region         | carbapenem-resistant <i>E. coli</i> isolates |                   |                       |                   |                       |                   | type of other data source    |
|----------------|----------------------------------------------|-------------------|-----------------------|-------------------|-----------------------|-------------------|------------------------------|
|                | 2014                                         |                   | 2015                  |                   | 2016                  |                   |                              |
|                | national surveillance                        | other data source | national surveillance | other data source | national surveillance | other data source |                              |
| Piemonte       | 4                                            | 4                 | 6                     | 7                 | 4                     | 4                 | regional surv. <sup>c</sup>  |
| Emilia-Romagna | 1                                            | 4                 | 5                     | 6                 | 8                     | 8                 | regional report <sup>d</sup> |
| Campania       | 0                                            | 3 <sup>a</sup>    | 0                     | 5 <sup>a</sup>    | 1                     | 9 <sup>a</sup>    | regional report <sup>e</sup> |
| Toscana        | 1                                            | 2 <sup>b</sup>    | 2                     | 5 <sup>b</sup>    | 2                     | 4 <sup>b</sup>    | regional report <sup>f</sup> |

<sup>a</sup> the regional antimicrobial resistance report shows this number of *K. pneumoniae* or *E. coli* isolates from blood and liquor as resistant to meropenem and/or imipenem; here we report the highest number of cases resistant to either antibiotic.

<sup>b</sup> the regional antimicrobial resistance report shows this number of *K. pneumoniae* or *E. coli* isolates from blood as resistant to meropenem and/or imipenem; here we report the highest number of cases resistant to either antibiotic.

<sup>c</sup> <https://www.seremi.it/viz-condizioni/Antibioticoresistenze>

<sup>d</sup> <http://assr.regione.emilia-romagna.it/it/servizi/pubblicazioni/rapporti-documenti/sorveglianza-antibioticoresistenza-uso-antibiotici-rapporto-2016>

<sup>e</sup> <http://www.regione.campania.it/regione/it/tematiche/antibiotico-resistenza-ed-infezioni-correlate-all-assistenza-64in/antibiotico-resistenza-ed-infezioni-correlate-all-assistenza-r11p>

<sup>f</sup> <https://www.ars.toscana.it/it/pubblicazioni/rapporti-relazioni-e-sintesi/2017/3855-report-2016-su-antibiotico-resistenza-e-uso-di-antibiotici-in-toscana.html>
